# Supplementary material for: Changes of Species Composition, Diversity, and Biomass of Secondary Dry Grasslands After Long-Term Mowing, a Case Study in Hungary
Source: Preprints.org preprint supplement (doi:10.20944/preprints202404.0806.v1), 2024-04-11
Supplement: Supplementary file 3 [file supplementary]

|  |  |  | MOWN |  |  |  |  |  |  | CONTROL |  |  |
| --- | --- | --- | --- | --- | --- | --- | --- | --- | --- | --- | --- | --- |
|  | 2001 |  | 2006 |  | 2011 |  |  | 2001 |  | 2006 |  | 2011 |
|  | Mean |  | Mean |  | Mean |  |  | Mean |  | Mean |  | Mean |
| Total cover absolute | 95,54 |  | 102,18 |  | 111,91 |  |  | 108,09 |  | 108,03 |  | 111,71 |
| Cover of *C. epigejos* absolute | 62,38 |  | 20,00 |  | 7,50 |  |  | 69,38 |  | 62,50 |  | 56,88 |
| Cover of *C. epigejos* relative | 0,65 |  | 0,19 |  | 0,06 |  |  | 0,64 |  | 0,58 |  | 0,51 |
| Cover of subordinated species absolute | 33,16 |  | 82,18 |  | 104,41 |  |  | 38,71 |  | 45,53 |  | 54,84 |
| Cover of subordinated species relative | 0,35 |  | 0,81 |  | 0,94 |  |  | 0,36 |  | 0,42 |  | 0,49 |
| Number of species | 16,50 |  | 25,00 |  | 34,63 |  |  | 15,25 |  | 17,75 |  | 25,00 |
|  |  |  |  |  |  |  |  |  |  |  |  |  |
